# Supplementary material for: Impacts, Potential Benefits and Eradication Feasibility of Aquatic Alien Species in an Integral Natural State Reserve
Source: Biology (Basel). 2024 Jan 22;13(1):64. doi: 10.3390/biology13010064 (PMC10813597; doi:10.3390/biology13010064)
Supplement: Supplementary file 1 [file biology-13-00064-s001.zip › Suppl. Materials 1_Paganelli et al.xlsx]

## Sheet: INSEAT P. clarkii
[Species name – Common name]	Procambarus clarkii - Red swamp crayfish
Question 1. Spatial occupation	Please describe the current invasion stage of this species in [Country/area]	Level of confidence
Score
1	Local – the species is found in a single site or covers a small area of the [country/area], less than 10% of the area of the [country/area]
2	Regional – populations are present in between 10 and 75% of the area of the [country/area]
3	National – populations are present in more than 75% of the area of the [country/area]	High
-	I don't know
Question 2. Spreading capacity	Please describe the spreading capacity of this species
Score
1	Low potential - the species spreads slowly
2	Medium/moderate potential – the species spreads rapidly but does not double its range in less than 10 years
3	High potential - the species spreads rapidly, doubling its range in less than 10 years	High
-	I don't know
Question 3. Management effort	Please select the management effort necessary to eradicate this species
Score
1	Low efforts – the species can be eradicated locally with low resources input (easy access, no need for machinery, skilled staff or materials such as pesticides)
2	Medium efforts – the species can be eradicated with medium resources input (access requires certain effort, might need machinery, skilled staff or materials such as pesticides)
3	High efforts– can be eradicated but is resource intensive (due to complicated access, need of machinery, skilled staff and materials such as pesticides)	High
4	Unmanageable – management measures cannot eradicate the species due to impossible accessibility or physical resources
-	I don't know
Question 4. Ecosystem services impact assessment	Impact score definition
Score
4	The species leads to an increase in the provision of the ecosystem service, which is both intense and irreversible
3	Substantial increase in the provision of the ecosystem service; the effect is reversible if the species is managed or removed
2	Noticeable increase in the provision of the ecosystem service but reversible if the species is managed or removed
1	The increase in the provision of the ecosystem service is too small to be significant
0	No impacts detectable/ecosystem services not applicable to this species
-1	The reduction in the provision of the ecosystem service is too small to be significant
-2	Noticeable reduction in the provision of the ecosystem service; it is reversible if the species is managed or removed
-3	Substantial reduction in the provision of the ecosystem service; the effect is reversible if the species is managed or removed	High
-4	The species leads to a reduction in the provision of the ecosystem service, which is both intense and irreversible
-	I don't know
-	Data deficient
Ecosystem services. Please score the general impact of this species on each ecosystem service and indicate the confidence
Score	Provisioning services. These are the products that people obtain from ecosystems
0	Crops or livestock (i.e. provision of food)
0	Harvested wild goods (i.e. ornamental/medicinal resources/wild game)
0	Trees, standing vegetation, peat (i.e. fuels and construction material)
0	Water supply (i.e. supply of local water)
-3	Wild species diversity (genetic diversity for animal and plant breeding)	High
	Regulating services
-2	Detoxification and purification in soils, air and water	High
0	Climate regulation (i.e. local (e.g. temperature and precipitation) or global (e.g. carbon sequestration) regulation)
-2	Hazard regulation (i.e. moderation of extreme events as floods or storms)	High
0	Pollination
0	Noise regulation
0	Erosion regulation (i.e. Erosion prevention and maintenance of soil fertility)
	Cultural services
0	Spiritual experience and sense of place (i.e. religious meaning or sense of belonging)
0	Aesthetic appreciation and inspiration for culture, art, design
-3	Recreation and tourism	High
0	Mental and physical health
0	Knowledge systems and educational values (i.e. types of knowledge and basis for education)
Question 5. Species potential	Let's suppose that the negative impacts of this species on the environment can be mitigated with an appropriate management of its wild populations. Do you think this species would then have the potential to provide any of the following benefits? Please, choose YES for the ecosystem services that can be improved
	Provisioning services
YES	Crops or livestock (i.e. provision of food)	High
YES	Harvested wild goods (i.e. ornamental/medicinal resources/wild game)	High
NO	Trees, standing vegetation, peat (i.e. fuels and construction material)
NO	Water supply (i.e. supply of local water)
NO	Wild species diversity (genetic diversity for animal and plant breeding)
	Regulating services
NO	Detoxification and purification in soils, air and water
NO	Climate regulation (i.e. local (e.g. temperature and precipitation) or global (e.g. carbon sequestration) regulation)
NO	Hazard regulation (i.e. moderation of extreme events as floods or storms)
NO	Pollination
NO	Noise regulation
NO	Erosion regulation (i.e. Erosion prevention and maintenance of soil fertility)
	Cultural services
NO	Spiritual experience and sense of place (i.e. religious meaning or sense of belonging)
NO	Aesthetic appreciation and inspiration for culture, art, design
NO	Recreation and tourism
NO	Mental and physical health
NO	Knowledge systems and educational values (i.e. types of knowledge and basis for education)
Question 6. Please provide any information (e.g. scientific evidence, personal observations, professional opinions) that support your assessment in general.
Procambarus clarkii (red swamp crayfish) | CABI Compendium (cabidigitallibrary.org)

## Sheet: INSEAT Gambusia holbrooki
[Species name – Common name]	Gambusia holbrooki
Question 1. Spatial occupation	Please describe the current invasion stage of this species in [Country/area]	Level of confidence
Score
1	Local – the species is found in a single site or covers a small area of the [country/area], less than 10% of the area of the [country/area]
2	Regional – populations are present in between 10 and 75% of the area of the [country/area]
3	National – populations are present in more than 75% of the area of the [country/area]	high
-	I don't know
Question 2. Spreading capacity	Please describe the spreading capacity of this species
Score
1	Low potential - the species spreads slowly
2	Medium/moderate potential – the species spreads rapidly but does not double its range in less than 10 years
3	High potential - the species spreads rapidly, doubling its range in less than 10 years	high
-	I don't know
Question 3. Management effort	Please select the management effort necessary to eradicate this species
Score
1	Low efforts – the species can be eradicated locally with low resources input (easy access, no need for machinery, skilled staff or materials such as pesticides)
2	Medium efforts – the species can be eradicated with medium resources input (access requires certain effort, might need machinery, skilled staff or materials such as pesticides)
3	High efforts– can be eradicated but is resource intensive (due to complicated access, need of machinery, skilled staff and materials such as pesticides)
4	Unmanageable – management measures cannot eradicate the species due to impossible accessibility or physical resources
-	I don't know
Question 4. Ecosystem services impact assessment	Impact score definition
Score
4	The species leads to an increase in the provision of the ecosystem service, which is both intense and irreversible
3	Substantial increase in the provision of the ecosystem service; the effect is reversible if the species is managed or removed
2	Noticeable increase in the provision of the ecosystem service but reversible if the species is managed or removed
1	The increase in the provision of the ecosystem service is too small to be significant
0	No impacts detectable/ecosystem services not applicable to this species
-1	The reduction in the provision of the ecosystem service is too small to be significant
-2	Noticeable reduction in the provision of the ecosystem service; it is reversible if the species is managed or removed
-3	Substantial reduction in the provision of the ecosystem service; the effect is reversible if the species is managed or removed	high
-4	The species leads to a reduction in the provision of the ecosystem service, which is both intense and irreversible
-	I don't know
-	Data deficient
Ecosystem services. Please score the general impact of this species on each ecosystem service and indicate the confidence
Score	Provisioning services. These are the products that people obtain from ecosystems
0	Crops or livestock (i.e. provision of food)
0	Harvested wild goods (i.e. ornamental/medicinal resources/wild game)
0	Trees, standing vegetation, peat (i.e. fuels and construction material)
0	Water supply (i.e. supply of local water)
-3	Wild species diversity (genetic diversity for animal and plant breeding)	high
	Regulating services
0	Detoxification and purification in soils, air and water
0	Climate regulation (i.e. local (e.g. temperature and precipitation) or global (e.g. carbon sequestration) regulation)
0	Hazard regulation (i.e. moderation of extreme events as floods or storms)
0	Pollination
0	Noise regulation
0	Erosion regulation (i.e. Erosion prevention and maintenance of soil fertility)
	Cultural services
0	Spiritual experience and sense of place (i.e. religious meaning or sense of belonging)
0	Aesthetic appreciation and inspiration for culture, art, design
-1	Recreation and tourism	high
0	Mental and physical health
0	Knowledge systems and educational values (i.e. types of knowledge and basis for education)
Question 5. Species potential	Let's suppose that the negative impacts of this species on the environment can be mitigated with an appropriate management of its wild populations. Do you think this species would then have the potential to provide any of the following benefits? Please, choose YES for the ecosystem services that can be improved
	Provisioning services
NO	Crops or livestock (i.e. provision of food)
YES	Harvested wild goods (i.e. ornamental/medicinal resources/wild game)	high
NO	Trees, standing vegetation, peat (i.e. fuels and construction material)
NO	Water supply (i.e. supply of local water)
NO	Wild species diversity (genetic diversity for animal and plant breeding)
	Regulating services
NO	Detoxification and purification in soils, air and water
NO	Climate regulation (i.e. local (e.g. temperature and precipitation) or global (e.g. carbon sequestration) regulation)
NO	Hazard regulation (i.e. moderation of extreme events as floods or storms)
NO	Pollination
NO	Noise regulation
NO	Erosion regulation (i.e. Erosion prevention and maintenance of soil fertility)
	Cultural services
NO	Spiritual experience and sense of place (i.e. religious meaning or sense of belonging)
NO	Aesthetic appreciation and inspiration for culture, art, design
NO	Recreation and tourism
NO	Mental and physical health
NO	Knowledge systems and educational values (i.e. types of knowledge and basis for education)
Question 6. Please provide any information (e.g. scientific evidence, personal observations, professional opinions) that support your assessment in general.
Gambusia holbrooki (eastern mosquitofish) | CABI Compendium (cabidigitallibrary.org)
GISD (iucngisd.org)

## Sheet: INSEAT Lepomis gibbosus
[Species name – Common name]	Lepomis gibbosus
Question 1. Spatial occupation	Please describe the current invasion stage of this species in [Country/area]	Level of confidence
Score
1	Local – the species is found in a single site or covers a small area of the [country/area], less than 10% of the area of the [country/area]
2	Regional – populations are present in between 10 and 75% of the area of the [country/area]
3	National – populations are present in more than 75% of the area of the [country/area]	high
-	I don't know
Question 2. Spreading capacity	Please describe the spreading capacity of this species
Score
1	Low potential - the species spreads slowly
2	Medium/moderate potential – the species spreads rapidly but does not double its range in less than 10 years
3	High potential - the species spreads rapidly, doubling its range in less than 10 years	high
-	I don't know
Question 3. Management effort	Please select the management effort necessary to eradicate this species
Score
1	Low efforts – the species can be eradicated locally with low resources input (easy access, no need for machinery, skilled staff or materials such as pesticides)
2	Medium efforts – the species can be eradicated with medium resources input (access requires certain effort, might need machinery, skilled staff or materials such as pesticides)	high
3	High efforts– can be eradicated but is resource intensive (due to complicated access, need of machinery, skilled staff and materials such as pesticides)
4	Unmanageable – management measures cannot eradicate the species due to impossible accessibility or physical resources
-	I don't know
Question 4. Ecosystem services impact assessment	Impact score definition
Score
4	The species leads to an increase in the provision of the ecosystem service, which is both intense and irreversible
3	Substantial increase in the provision of the ecosystem service; the effect is reversible if the species is managed or removed
2	Noticeable increase in the provision of the ecosystem service but reversible if the species is managed or removed
1	The increase in the provision of the ecosystem service is too small to be significant
0	No impacts detectable/ecosystem services not applicable to this species
-1	The reduction in the provision of the ecosystem service is too small to be significant
-2	Noticeable reduction in the provision of the ecosystem service; it is reversible if the species is managed or removed
-3	Substantial reduction in the provision of the ecosystem service; the effect is reversible if the species is managed or removed	high
-4	The species leads to a reduction in the provision of the ecosystem service, which is both intense and irreversible
-	I don't know
-	Data deficient
Ecosystem services. Please score the general impact of this species on each ecosystem service and indicate the confidence
Score	Provisioning services. These are the products that people obtain from ecosystems
0	Crops or livestock (i.e. provision of food)
0	Harvested wild goods (i.e. ornamental/medicinal resources/wild game)
0	Trees, standing vegetation, peat (i.e. fuels and construction material)
0	Water supply (i.e. supply of local water)
-3	Wild species diversity (genetic diversity for animal and plant breeding)	high
	Regulating services
0	Detoxification and purification in soils, air and water
0	Climate regulation (i.e. local (e.g. temperature and precipitation) or global (e.g. carbon sequestration) regulation)
0	Hazard regulation (i.e. moderation of extreme events as floods or storms)
0	Pollination
0	Noise regulation
0	Erosion regulation (i.e. Erosion prevention and maintenance of soil fertility)
	Cultural services
0	Spiritual experience and sense of place (i.e. religious meaning or sense of belonging)
0	Aesthetic appreciation and inspiration for culture, art, design
-1	Recreation and tourism
0	Mental and physical health
0	Knowledge systems and educational values (i.e. types of knowledge and basis for education)
Question 5. Species potential	Let's suppose that the negative impacts of this species on the environment can be mitigated with an appropriate management of its wild populations. Do you think this species would then have the potential to provide any of the following benefits? Please, choose YES for the ecosystem services that can be improved
	Provisioning services
YES	Crops or livestock (i.e. provision of food)
YES	Harvested wild goods (i.e. ornamental/medicinal resources/wild game)
NO	Trees, standing vegetation, peat (i.e. fuels and construction material)
NO	Water supply (i.e. supply of local water)
NO	Wild species diversity (genetic diversity for animal and plant breeding)
	Regulating services
NO	Detoxification and purification in soils, air and water
NO	Climate regulation (i.e. local (e.g. temperature and precipitation) or global (e.g. carbon sequestration) regulation)
NO	Hazard regulation (i.e. moderation of extreme events as floods or storms)
NO	Pollination
NO	Noise regulation
NO	Erosion regulation (i.e. Erosion prevention and maintenance of soil fertility)
	Cultural services
NO	Spiritual experience and sense of place (i.e. religious meaning or sense of belonging)
1	Aesthetic appreciation and inspiration for culture, art, design
1	Recreation and tourism
NO	Mental and physical health
NO	Knowledge systems and educational values (i.e. types of knowledge and basis for education)
Question 6. Please provide any information (e.g. scientific evidence, personal observations, professional opinions) that support your assessment in general.
Lepomis gibbosus (pumpkinseed) | CABI Compendium (cabidigitallibrary.org)
Tamborini D., Trasforini S., Puzzi C. (2018). Pesci. In: Bisi F., Montagnani C., Cardarelli E., Manenti R., Trasforini S., Gentili R., Ardenghi NMG, Citterio S., Bogliani G., Ficetola F., Rubolini D., Puzzi C., Scelsi F., Rampa A., Rossi E., Mazzamuto MV, Wauters LA, Martinoli A. (2018). Strategia di azione e degli interventi per il controllo e la gestione delle specie alloctone in Regione Lombar…

## Sheet: INSEAT Pseudorasbora parva
[Species name – Common name]	Pseudorasbora parva
Question 1. Spatial occupation	Please describe the current invasion stage of this species in [Country/area]	Level of confidence
Score
1	Local – the species is found in a single site or covers a small area of the [country/area], less than 10% of the area of the [country/area]
2	Regional – populations are present in between 10 and 75% of the area of the [country/area]
3	National – populations are present in more than 75% of the area of the [country/area]
-	I don't know
Question 2. Spreading capacity	Please describe the spreading capacity of this species
Score
1	Low potential - the species spreads slowly
2	Medium/moderate potential – the species spreads rapidly but does not double its range in less than 10 years
3	High potential - the species spreads rapidly, doubling its range in less than 10 years
-	I don't know
Question 3. Management effort	Please select the management effort necessary to eradicate this species
Score
1	Low efforts – the species can be eradicated locally with low resources input (easy access, no need for machinery, skilled staff or materials such as pesticides)
2	Medium efforts – the species can be eradicated with medium resources input (access requires certain effort, might need machinery, skilled staff or materials such as pesticides)
3	High efforts– can be eradicated but is resource intensive (due to complicated access, need of machinery, skilled staff and materials such as pesticides)
4	Unmanageable – management measures cannot eradicate the species due to impossible accessibility or physical resources
-	I don't know
Question 4. Ecosystem services impact assessment	Impact score definition
Score
4	The species leads to an increase in the provision of the ecosystem service, which is both intense and irreversible
3	Substantial increase in the provision of the ecosystem service; the effect is reversible if the species is managed or removed
2	Noticeable increase in the provision of the ecosystem service but reversible if the species is managed or removed
1	The increase in the provision of the ecosystem service is too small to be significant
0	No impacts detectable/ecosystem services not applicable to this species
-1	The reduction in the provision of the ecosystem service is too small to be significant
-2	Noticeable reduction in the provision of the ecosystem service; it is reversible if the species is managed or removed
-3	Substantial reduction in the provision of the ecosystem service; the effect is reversible if the species is managed or removed
-4	The species leads to a reduction in the provision of the ecosystem service, which is both intense and irreversible
-	I don't know
-	Data deficient
Ecosystem services. Please score the general impact of this species on each ecosystem service and indicate the confidence
Score	Provisioning services. These are the products that people obtain from ecosystems
0	Crops or livestock (i.e. provision of food)
0	Harvested wild goods (i.e. ornamental/medicinal resources/wild game)
0	Trees, standing vegetation, peat (i.e. fuels and construction material)
0	Water supply (i.e. supply of local water)
-2	Wild species diversity (genetic diversity for animal and plant breeding)
	Regulating services
0	Detoxification and purification in soils, air and water
0	Climate regulation (i.e. local (e.g. temperature and precipitation) or global (e.g. carbon sequestration) regulation)
0	Hazard regulation (i.e. moderation of extreme events as floods or storms)
0	Pollination
0	Noise regulation
0	Erosion regulation (i.e. Erosion prevention and maintenance of soil fertility)
	Cultural services
0	Spiritual experience and sense of place (i.e. religious meaning or sense of belonging)
0	Aesthetic appreciation and inspiration for culture, art, design
-1	Recreation and tourism
0	Mental and physical health
0	Knowledge systems and educational values (i.e. types of knowledge and basis for education)
Question 5. Species potential	Let's suppose that the negative impacts of this species on the environment can be mitigated with an appropriate management of its wild populations. Do you think this species would then have the potential to provide any of the following benefits? Please, choose YES for the ecosystem services that can be improved
	Provisioning services
NO	Crops or livestock (i.e. provision of food)
NO	Harvested wild goods (i.e. ornamental/medicinal resources/wild game)
NO	Trees, standing vegetation, peat (i.e. fuels and construction material)
NO	Water supply (i.e. supply of local water)
NO	Wild species diversity (genetic diversity for animal and plant breeding)
	Regulating services
NO	Detoxification and purification in soils, air and water
NO	Climate regulation (i.e. local (e.g. temperature and precipitation) or global (e.g. carbon sequestration) regulation)
NO	Hazard regulation (i.e. moderation of extreme events as floods or storms)
NO	Pollination
NO	Noise regulation
NO	Erosion regulation (i.e. Erosion prevention and maintenance of soil fertility)
	Cultural services
NO	Spiritual experience and sense of place (i.e. religious meaning or sense of belonging)
NO	Aesthetic appreciation and inspiration for culture, art, design
NO	Recreation and tourism
NO	Mental and physical health
NO	Knowledge systems and educational values (i.e. types of knowledge and basis for education)
Question 6. Please provide any information (e.g. scientific evidence, personal observations, professional opinions) that support your assessment in general.
Witkowski, A. (2011): NOBANIS – Invasive Alien Species Fact Sheet – Pseudorasbora parva. – From: Online Database of the European Network on Invasive Alien Species – NOBANIS www.nobanis.org, Date of access x/x/201x
Tamborini D., Trasforini S., Puzzi C. (2018). Pseudorasbora parva. In: Bisi F., Montagnani C., Cardarelli E., Manenti R., Trasforini S., Gentili R., Ardenghi N.M.G., Citterio S., Bogliani G., Ficetola F., Rubolini D., Puzzi C., Scelsi F., Rampa A., Rossi E., Mazzamuto M.V., Wauters L.A., Martinoli A. (2018). Strategia di azione e degli interventi per il controllo e la gestione delle specie alloct…
Pseudorasbora parva (Topmouth Gudgeon) (iucnredlist.org)

## Sheet: INSEAT Rhodeus amarus
[Species name – Common name]	Rhodeus amarus
Question 1. Spatial occupation	Please describe the current invasion stage of this species in [Country/area]	Level of confidence
Score
1	Local – the species is found in a single site or covers a small area of the [country/area], less than 10% of the area of the [country/area]
2	Regional – populations are present in between 10 and 75% of the area of the [country/area]	high
3	National – populations are present in more than 75% of the area of the [country/area]
-	I don't know
Question 2. Spreading capacity	Please describe the spreading capacity of this species
Score
1	Low potential - the species spreads slowly
2	Medium/moderate potential – the species spreads rapidly but does not double its range in less than 10 years
3	High potential - the species spreads rapidly, doubling its range in less than 10 years	medium
-	I don't know
Question 3. Management effort	Please select the management effort necessary to eradicate this species
Score
1	Low efforts – the species can be eradicated locally with low resources input (easy access, no need for machinery, skilled staff or materials such as pesticides)
2	Medium efforts – the species can be eradicated with medium resources input (access requires certain effort, might need machinery, skilled staff or materials such as pesticides)	medium
3	High efforts– can be eradicated but is resource intensive (due to complicated access, need of machinery, skilled staff and materials such as pesticides)
4	Unmanageable – management measures cannot eradicate the species due to impossible accessibility or physical resources
-	I don't know
Question 4. Ecosystem services impact assessment	Impact score definition
Score
4	The species leads to an increase in the provision of the ecosystem service, which is both intense and irreversible
3	Substantial increase in the provision of the ecosystem service; the effect is reversible if the species is managed or removed
2	Noticeable increase in the provision of the ecosystem service but reversible if the species is managed or removed
1	The increase in the provision of the ecosystem service is too small to be significant
0	No impacts detectable/ecosystem services not applicable to this species
-1	The reduction in the provision of the ecosystem service is too small to be significant
-2	Noticeable reduction in the provision of the ecosystem service; it is reversible if the species is managed or removed	low
-3	Substantial reduction in the provision of the ecosystem service; the effect is reversible if the species is managed or removed
-4	The species leads to a reduction in the provision of the ecosystem service, which is both intense and irreversible
-	I don't know
-	Data deficient
Ecosystem services. Please score the general impact of this species on each ecosystem service and indicate the confidence
Score	Provisioning services. These are the products that people obtain from ecosystems
0	Crops or livestock (i.e. provision of food)
0	Harvested wild goods (i.e. ornamental/medicinal resources/wild game)
0	Trees, standing vegetation, peat (i.e. fuels and construction material)
0	Water supply (i.e. supply of local water)
-2	Wild species diversity (genetic diversity for animal and plant breeding)	medium
	Regulating services
0	Detoxification and purification in soils, air and water
0	Climate regulation (i.e. local (e.g. temperature and precipitation) or global (e.g. carbon sequestration) regulation)
0	Hazard regulation (i.e. moderation of extreme events as floods or storms)
0	Pollination
0	Noise regulation
0	Erosion regulation (i.e. Erosion prevention and maintenance of soil fertility)
	Cultural services
0	Spiritual experience and sense of place (i.e. religious meaning or sense of belonging)
0	Aesthetic appreciation and inspiration for culture, art, design
-1	Recreation and tourism
0	Mental and physical health
0	Knowledge systems and educational values (i.e. types of knowledge and basis for education)
Question 5. Species potential	Let's suppose that the negative impacts of this species on the environment can be mitigated with an appropriate management of its wild populations. Do you think this species would then have the potential to provide any of the following benefits? Please, choose YES for the ecosystem services that can be improved
	Provisioning services
NO	Crops or livestock (i.e. provision of food)
NO	Harvested wild goods (i.e. ornamental/medicinal resources/wild game)
NO	Trees, standing vegetation, peat (i.e. fuels and construction material)
NO	Water supply (i.e. supply of local water)
NO	Wild species diversity (genetic diversity for animal and plant breeding)
	Regulating services
NO	Detoxification and purification in soils, air and water
NO	Climate regulation (i.e. local (e.g. temperature and precipitation) or global (e.g. carbon sequestration) regulation)
NO	Hazard regulation (i.e. moderation of extreme events as floods or storms)
NO	Pollination
NO	Noise regulation
NO	Erosion regulation (i.e. Erosion prevention and maintenance of soil fertility)
	Cultural services
NO	Spiritual experience and sense of place (i.e. religious meaning or sense of belonging)
NO	Aesthetic appreciation and inspiration for culture, art, design
NO	Recreation and tourism
NO	Mental and physical health
NO	Knowledge systems and educational values (i.e. types of knowledge and basis for education)
Question 6. Please provide any information (e.g. scientific evidence, personal observations, professional opinions) that support your assessment in general.
Van Damme et al., 2007. The introduction of the European bitterling (Rhodeus amarus) to west and central Europe. F I SH and F I SHERI E S , 2007, 8, 79–106
Tatoj et al., 2017. The endangered thick-shelled river mussel (Unio crassus): a new host species for the European bitterling (Rhodeus amarus). Biodivers Conserv (2017) 26:1217–1224 DOI 10.1007/s10531-017-1295-y
Konecna and Reichard 2010. Journal of Fish Biology 78, 227–239 doi:10.1111/j.1095-8649.2010.02854.x

## Sheet: INSEAT Physella acuta
[Species name – Common name]	Physella acuta
Question 1. Spatial occupation	Please describe the current invasion stage of this species in [Country/area]	Level of confidence
Score
1	Local – the species is found in a single site or covers a small area of the [country/area], less than 10% of the area of the [country/area]
2	Regional – populations are present in between 10 and 75% of the area of the [country/area]	high
3	National – populations are present in more than 75% of the area of the [country/area]
-	I don't know
Question 2. Spreading capacity	Please describe the spreading capacity of this species
Score
1	Low potential - the species spreads slowly
2	Medium/moderate potential – the species spreads rapidly but does not double its range in less than 10 years
3	High potential - the species spreads rapidly, doubling its range in less than 10 years	high
-	I don't know
Question 3. Management effort	Please select the management effort necessary to eradicate this species
Score
1	Low efforts – the species can be eradicated locally with low resources input (easy access, no need for machinery, skilled staff or materials such as pesticides)
2	Medium efforts – the species can be eradicated with medium resources input (access requires certain effort, might need machinery, skilled staff or materials such as pesticides)
3	High efforts– can be eradicated but is resource intensive (due to complicated access, need of machinery, skilled staff and materials such as pesticides)	high
4	Unmanageable – management measures cannot eradicate the species due to impossible accessibility or physical resources
-	I don't know
Question 4. Ecosystem services impact assessment	Impact score definition
Score
4	The species leads to an increase in the provision of the ecosystem service, which is both intense and irreversible
3	Substantial increase in the provision of the ecosystem service; the effect is reversible if the species is managed or removed
2	Noticeable increase in the provision of the ecosystem service but reversible if the species is managed or removed
1	The increase in the provision of the ecosystem service is too small to be significant
0	No impacts detectable/ecosystem services not applicable to this species
-1	The reduction in the provision of the ecosystem service is too small to be significant
-2	Noticeable reduction in the provision of the ecosystem service; it is reversible if the species is managed or removed	high
-3	Substantial reduction in the provision of the ecosystem service; the effect is reversible if the species is managed or removed
-4	The species leads to a reduction in the provision of the ecosystem service, which is both intense and irreversible
-	I don't know
-	Data deficient
Ecosystem services. Please score the general impact of this species on each ecosystem service and indicate the confidence
Score	Provisioning services. These are the products that people obtain from ecosystems
0	Crops or livestock (i.e. provision of food)
0	Harvested wild goods (i.e. ornamental/medicinal resources/wild game)
0	Trees, standing vegetation, peat (i.e. fuels and construction material)
0	Water supply (i.e. supply of local water)	high
-2	Wild species diversity (genetic diversity for animal and plant breeding)	high
	Regulating services
0	Detoxification and purification in soils, air and water
0	Climate regulation (i.e. local (e.g. temperature and precipitation) or global (e.g. carbon sequestration) regulation)
0	Hazard regulation (i.e. moderation of extreme events as floods or storms)
0	Pollination
0	Noise regulation
0	Erosion regulation (i.e. Erosion prevention and maintenance of soil fertility)
	Cultural services
0	Spiritual experience and sense of place (i.e. religious meaning or sense of belonging)
0	Aesthetic appreciation and inspiration for culture, art, design
-1	Recreation and tourism
0	Mental and physical health
0	Knowledge systems and educational values (i.e. types of knowledge and basis for education)
Question 5. Species potential	Let's suppose that the negative impacts of this species on the environment can be mitigated with an appropriate management of its wild populations. Do you think this species would then have the potential to provide any of the following benefits? Please, choose YES for the ecosystem services that can be improved
	Provisioning services
NO	Crops or livestock (i.e. provision of food)
NO	Harvested wild goods (i.e. ornamental/medicinal resources/wild game)
NO	Trees, standing vegetation, peat (i.e. fuels and construction material)
NO	Water supply (i.e. supply of local water)
NO	Wild species diversity (genetic diversity for animal and plant breeding)
	Regulating services
NO	Detoxification and purification in soils, air and water
NO	Climate regulation (i.e. local (e.g. temperature and precipitation) or global (e.g. carbon sequestration) regulation)
NO	Hazard regulation (i.e. moderation of extreme events as floods or storms)
NO	Pollination
NO	Noise regulation
NO	Erosion regulation (i.e. Erosion prevention and maintenance of soil fertility)
	Cultural services
NO	Spiritual experience and sense of place (i.e. religious meaning or sense of belonging)
NO	Aesthetic appreciation and inspiration for culture, art, design
NO	Recreation and tourism
NO	Mental and physical health
NO	Knowledge systems and educational values (i.e. types of knowledge and basis for education)
Question 6. Please provide any information (e.g. scientific evidence, personal observations, professional opinions) that support your assessment in general.
GISD (iucngisd.org)
Physella acuta | CABI Compendium (cabidigitallibrary.org)
Acute bladder snail (Physella acuta) - Species Profile (usgs.gov)

## Sheet: INSEAT T. scripta
[Species name – Common name]	Trachemys scripta - red eaered slider
Question 1. Spatial occupation	Please describe the current invasion stage of this species in [Country/area]	Level of confidence
Score
1	Local – the species is found in a single site or covers a small area of the [country/area], less than 10% of the area of the [country/area]
2	Regional – populations are present in between 10 and 75% of the area of the [country/area]
3	National – populations are present in more than 75% of the area of the [country/area]	high
-	I don't know
Question 2. Spreading capacity	Please describe the spreading capacity of this species
Score
1	Low potential - the species spreads slowly
2	Medium/moderate potential – the species spreads rapidly but does not double its range in less than 10 years
3	High potential - the species spreads rapidly, doubling its range in less than 10 years	high
-	I don't know
Question 3. Management effort	Please select the management effort necessary to eradicate this species
Score
1	Low efforts – the species can be eradicated locally with low resources input (easy access, no need for machinery, skilled staff or materials such as pesticides)
2	Medium efforts – the species can be eradicated with medium resources input (access requires certain effort, might need machinery, skilled staff or materials such as pesticides)
3	High efforts– can be eradicated but is resource intensive (due to complicated access, need of machinery, skilled staff and materials such as pesticides)	high
4	Unmanageable – management measures cannot eradicate the species due to impossible accessibility or physical resources
-	I don't know
Question 4. Ecosystem services impact assessment	Impact score definition
Score
4	The species leads to an increase in the provision of the ecosystem service, which is both intense and irreversible
3	Substantial increase in the provision of the ecosystem service; the effect is reversible if the species is managed or removed
2	Noticeable increase in the provision of the ecosystem service but reversible if the species is managed or removed
1	The increase in the provision of the ecosystem service is too small to be significant
0	No impacts detectable/ecosystem services not applicable to this species
-1	The reduction in the provision of the ecosystem service is too small to be significant
-2	Noticeable reduction in the provision of the ecosystem service; it is reversible if the species is managed or removed
-3	Substantial reduction in the provision of the ecosystem service; the effect is reversible if the species is managed or removed	high
-4	The species leads to a reduction in the provision of the ecosystem service, which is both intense and irreversible
-	I don't know
-	Data deficient
Ecosystem services. Please score the general impact of this species on each ecosystem service and indicate the confidence
Score	Provisioning services. These are the products that people obtain from ecosystems
0	Crops or livestock (i.e. provision of food)
0	Harvested wild goods (i.e. ornamental/medicinal resources/wild game)
0	Trees, standing vegetation, peat (i.e. fuels and construction material)
0	Water supply (i.e. supply of local water)
-3	Wild species diversity (genetic diversity for animal and plant breeding)	high
	Regulating services
0	Detoxification and purification in soils, air and water
0	Climate regulation (i.e. local (e.g. temperature and precipitation) or global (e.g. carbon sequestration) regulation)
0	Hazard regulation (i.e. moderation of extreme events as floods or storms)
0	Pollination
0	Noise regulation
0	Erosion regulation (i.e. Erosion prevention and maintenance of soil fertility)
	Cultural services
0	Spiritual experience and sense of place (i.e. religious meaning or sense of belonging)
0	Aesthetic appreciation and inspiration for culture, art, design
-2	Recreation and tourism
0	Mental and physical health
0	Knowledge systems and educational values (i.e. types of knowledge and basis for education)
Question 5. Species potential	Let's suppose that the negative impacts of this species on the environment can be mitigated with an appropriate management of its wild populations. Do you think this species would then have the potential to provide any of the following benefits? Please, choose YES for the ecosystem services that can be improved
	Provisioning services
NO	Crops or livestock (i.e. provision of food)
1	Harvested wild goods (i.e. ornamental/medicinal resources/wild game)
NO	Trees, standing vegetation, peat (i.e. fuels and construction material)
NO	Water supply (i.e. supply of local water)
NO	Wild species diversity (genetic diversity for animal and plant breeding)
	Regulating services
NO	Detoxification and purification in soils, air and water
NO	Climate regulation (i.e. local (e.g. temperature and precipitation) or global (e.g. carbon sequestration) regulation)
NO	Hazard regulation (i.e. moderation of extreme events as floods or storms)
NO	Pollination
NO	Noise regulation
NO	Erosion regulation (i.e. Erosion prevention and maintenance of soil fertility)
	Cultural services
NO	Spiritual experience and sense of place (i.e. religious meaning or sense of belonging)
1	Aesthetic appreciation and inspiration for culture, art, design
NO	Recreation and tourism
NO	Mental and physical health
NO	Knowledge systems and educational values (i.e. types of knowledge and basis for education)
Question 6. Please provide any information (e.g. scientific evidence, personal observations, professional opinions) that support your assessment in general.
Trachemys scripta elegans (red-eared slider) | CABI Compendium (cabidigitallibrary.org)
Piano nazionale per la gestione della testuggine palustre americana (Trachemys scripta), 2020
Piano di controllo e gestione delle specie esotiche di testuggini palustri (Trachemys scripta ssp) - LIFE Gestire, 2019
Piano di eradicazione della Trachemys scripta spp. in Sardegna - 2020
Controllo e eradicazione della specie Trachemys scripta spp. e altre testuggini palustri esotiche - LIFE Regione Veneto 2018
Re‑evaluating invasive species in degraded ecosystems: a case study of red‑eared slider turtles as partial ecological analogs - Dupuis‑Desormeaux et al 2022
How well do we understand the impacts of alien species on ecosystem services? A pan-European, cross-taxa assessment - Vilà et al 2010
Impact of the introduction of the red-eared slider (Trachemys scripta elegans) on survival rates of the European pond turtle (Emys orbicularis) - Cadi&Joly 2004
A global meta-analysis of the ecological impacts of alien species on native amphibians - Nunes et al. 2019
Demonstration strategy and techniques for the eradication of invasive freshwater turtles - Results of LIFE Trachemys - 2013
Ligurian Invasive Fauna Eradication pro-indigenous Emys orbicularis restocking - 2018
Sancho Alcayde et al., 2015. Manual para el control y erradicación de galápagos invasores. Colección Manuales Técnicos de Biodiversidad, 6. Conselleria d’Agricultura, Medi Ambient, Canvi Climàtic i Desenvolupament Rural. Generalitat Valenciana, Valencia, 78 pp.
The Practicalities of Eradicating Red-eared Slider Turtles (Trachemys scripta elegans) - O’Keeffe 2009 (in Genovesi 2009)

## Sheet: INSEAT P. kurtmuelleri
[Species name – Common name]	P. kurtmuelleri - Balkan frog
Question 1. Spatial occupation	Please describe the current invasion stage of this species in [Country/area]	Level of confidence
Score
1	Local – the species is found in a single site or covers a small area of the [country/area], less than 10% of the area of the [country/area]
2	Regional – populations are present in between 10 and 75% of the area of the [country/area]	HIGH	the species has been detected in Liguria, Lombardy, Piedmont, Emilia-Romagna, FriuliVG, TrentinoAA, Tuscany, Latium, Calabria, Sardinia
3	National – populations are present in more than 75% of the area of the [country/area]
-	I don't know
Question 2. Spreading capacity	Please describe the spreading capacity of this species
Score
1	Low potential - the species spreads slowly
2	Medium/moderate potential – the species spreads rapidly but does not double its range in less than 10 years
3	High potential - the species spreads rapidly, doubling its range in less than 10 years	HIGH	the species spread over several km per year.
-	I don't know
Question 3. Management effort	Please select the management effort necessary to eradicate this species
Score
1	Low efforts – the species can be eradicated locally with low resources input (easy access, no need for machinery, skilled staff or materials such as pesticides)
2	Medium efforts – the species can be eradicated with medium resources input (access requires certain effort, might need machinery, skilled staff or materials such as pesticides)
3	High efforts– can be eradicated but is resource intensive (due to complicated access, need of machinery, skilled staff and materials such as pesticides)	HIGH	THE ONLY POSSIBLE WAY TO REMOVE THE SPECIES SHOULD BE REMOVING ALL THE TAXA FROM THE HABITAT SUITABLE FOR THE ALIEN AT THE VERY FIRST STAGE OF THE INVASION. INDEED, NATIVE TAXA AND PARTICULARLY P. LESSONAE HAS ECOLOGICAL REQUIREMENTS THAT SLIGHTLY DIFFER FROM THOSE TYPICAL OF THE INVADER (NOT CLEAR WHAT CONCERNS THE POLLUTED HYBRID).
4	Unmanageable – management measures cannot eradicate the species due to impossible accessibility or physical resources	HIGH	once the species has been introduced, there is no way to remove it as it is difficult to be morphologically distinguished from native species, has very high reproductive potential, and spread over wide distance range per year (km).
-	I don't know
Question 4. Ecosystem services impact assessment	Impact score definition
Score
4	The species leads to an increase in the provision of the ecosystem service, which is both intense and irreversible
3	Substantial increase in the provision of the ecosystem service; the effect is reversible if the species is managed or removed
2	Noticeable increase in the provision of the ecosystem service but reversible if the species is managed or removed
1	The increase in the provision of the ecosystem service is too small to be significant
0	No impacts detectable/ecosystem services not applicable to this species
-1	The reduction in the provision of the ecosystem service is too small to be significant
-2	Noticeable reduction in the provision of the ecosystem service; it is reversible if the species is managed or removed
-3	Substantial reduction in the provision of the ecosystem service; the effect is reversible if the species is managed or removed
-4	The species leads to a reduction in the provision of the ecosystem service, which is both intense and irreversible	HIGH	the species is invasive and preys on several animal taxa (arthropods, small vertebrates including other amphibians and mammals) and hybridize with native taxa.
-	I don't know
-	Data deficient
Ecosystem services. Please score the general impact of this species on each ecosystem service and indicate the confidence
Score	Provisioning services. These are the products that people obtain from ecosystems
0	Crops or livestock (i.e. provision of food)
0	Harvested wild goods (i.e. ornamental/medicinal resources/wild game)
0	Trees, standing vegetation, peat (i.e. fuels and construction material)
0	Water supply (i.e. supply of local water)
-4	Wild species diversity (genetic diversity for animal and plant breeding)	HIGH	the species hybridize with native species leading to the disruption of hybridogenetic equilibria and the local extinction of native taxa. According to the literature and experimental evidences, crosses with P. kurtmuelleri mainly leads to unviable and unfertile offspring promoting local extinction of native populations.
	Regulating services
0	Detoxification and purification in soils, air and water
0	Climate regulation (i.e. local (e.g. temperature and precipitation) or global (e.g. carbon sequestration) regulation)
0	Hazard regulation (i.e. moderation of extreme events as floods or storms)
0	Pollination
0	Noise regulation
0	Erosion regulation (i.e. Erosion prevention and maintenance of soil fertility)
	Cultural services
0	Spiritual experience and sense of place (i.e. religious meaning or sense of belonging)
-3	Aesthetic appreciation and inspiration for culture, art, design	HIGH	hybridization with native species leads to local extiction of native species.
-2	Recreation and tourism	MEDIUM	The species preys on native amphibians and several other animal taxa that could be locally relevant for tourism.
0	Mental and physical health
0	Knowledge systems and educational values (i.e. types of knowledge and basis for education)
Question 5. Species potential	Let's suppose that the negative impacts of this species on the environment can be mitigated with an appropriate management of its wild populations. Do you think this species would then have the potential to provide any of the following benefits? Please, choose YES for the ecosystem services that can be improved
	Provisioning services
1	Crops or livestock (i.e. provision of food)	LOW	if the species would be introduced in artificial and confined habitat where native species and other amphibians are absent (but it is not!), they could (in theory) provide food.
NO	Harvested wild goods (i.e. ornamental/medicinal resources/wild game)
NO	Trees, standing vegetation, peat (i.e. fuels and construction material)
NO	Water supply (i.e. supply of local water)
NO	Wild species diversity (genetic diversity for animal and plant breeding)
	Regulating services
NO	Detoxification and purification in soils, air and water
NO	Climate regulation (i.e. local (e.g. temperature and precipitation) or global (e.g. carbon sequestration) regulation)
NO	Hazard regulation (i.e. moderation of extreme events as floods or storms)
NO	Pollination
NO	Noise regulation
NO	Erosion regulation (i.e. Erosion prevention and maintenance of soil fertility)
	Cultural services
NO	Spiritual experience and sense of place (i.e. religious meaning or sense of belonging)
NO	Aesthetic appreciation and inspiration for culture, art, design
NO	Recreation and tourism
NO	Mental and physical health
NO	Knowledge systems and educational values (i.e. types of knowledge and basis for education)
Question 6. Please provide any information (e.g. scientific evidence, personal observations, professional opinions) that support your assessment in general.
personal observations listed along each question's answer.
Bellati, A., Chiocchio, A., Razzetti, E., Bisconti, R., & Canestrelli, D. (2023). A hotchpotch of water frogs in northern Italy. Biological Invasions, 1-9.
Bellati, A., Bassu, L., Nulchis, V., & Corti, C. (2019). Detection of alien Pelophylax species in Sardinia (western Mediterranean, Italy). BioInvasions Record, 8(1).
Bruni, G., Mirabella, I., Domeneghetti, D., Fasola, M., & Bellati, A. (2020). Will there be a second extinction? Molecular identification of multiple alien water frogs (Pelophylax ridibundus sensu lato) in Tuscany, Central Italy, reveals genetic pollution within a unique hybridogenetic system. Herpetological Journal, 30(3).
Bisconti, R., Martino, G., Chiocchio, A., Siclari, A., & Canestrelli, D. (2019). Balkan marsh frogs Pelophylax kurtmuelleri (Gayda, 1940) introduced in the Aspromonte National Park, southern Italy. BioInvasions Record, 8(1).
Razzetti, E., Pellitteri-rosa, D., Sacchi, R., Tiso, E., & Bernini, F. (2010). Primi dati sulla presenza di Pelophylax kurtmuelleri (Gayda, 1940) in Lombardia. In Atti VIII Congresso Nazionale Societas Herpetologica Italica (Chieti, 22-26 settembre 2010)(pp. 341-347).
Bellati, A., Razzetti, E., Resteghini, M., Sacchi, R., Pellitteri-Rosa, D., Casiraghi, M., Galeotti, P., & Fasola, M. (2013). First molecular characterization of invasive alien populations of Pelophylax kurtmuelleri (Gayda, 1940) and new records from Italy. In Atti IX Congresso Nazionale della Societas Herpetologica Italica (Bari-Conversano, 26-30 Settembre 2012) (pp. 287-289).
Di Nicola, M. R., & Feere, J. R. (2022). First case of predation of the Tyrrhenian endemic Sardinian tree frog Hyla sarda by an alien water frog Pelophylax sp. in northern Sardinia, Italy. Herpetological Bulletin, 161, 40-41.
Bressi, N. (2006). Pelophylax ridibundus (Pallas, 1771) in Italia, dalla rarefazione all’espansione e Pelophylax kurtmuelleri (Gayda, 1940), nuova specie per la Slovenia. Atti Mus. Civ. Stor. Nat. Trieste, 53, 3-10.
Andreone, F. (2017). Alternative strategies for amphibian conservation: a response to Muths & Fisher. Oryx, 51(2), 214-215.
Ficetola, G. F., & Scali, S. (2010). Invasive amphibians and reptiles in Italy. In Atti VIII Congresso Nazionale Societas Herpetologica Italica (pp. 335-340). Pescara, Italy: Ianieri Edizioni.
Falaschi, M., Mangiacotti, M., Sacchi, R., Scali, S., & Razzetti, E. (2018). Electric circuit theory applied to alien invasions: a connectivity model predicting the Balkan frog expansion in Northern Italy. Acta Herpetologica, 13(1), 33-42.
Katsiyiannis, P., & Tzoras, E. (2020). First record of Pelophylax kurtmuelleri preying on Hyla arborea in Greece. Parnass. Arch, 8, 17-18.
Holsbeek, G., Mergeay, J., Volckaert, F. A. M., & De Meester, L. (2010). Genetic detection of multiple exotic water frog species in Belgium illustrates the need for monitoring and immediate action. Biological invasions, 12, 1459-1463.
Pille, F., Pinto, L., & Denoël, M. (2021). Predation pressure of invasive marsh frogs: a threat to native amphibians?. Diversity, 13(11), 595.
Litvinchuk, S. N., Ivanov, A. Y., Lukonina, S. A., & Ermakov, O. A. (2020). A record of alien Pelophylax species and widespread mitochondrial DNA transfer in Kaliningradskaya Oblast’(the Baltic coast, Russia). BioInvasions Records, 9(3), 599-617.
Dufresnes, C., Leuenberger, J., Amrhein, V., Bühler, C., Thiébaud, J., Bohnenstengel, T., & Dubey, S. (2018). Invasion genetics of marsh frogs (Pelophylax ridibundus sensu lato) in Switzerland. Biological Journal of the Linnean Society, 123(2), 402-410.
Dufresnes, C., Denoël, M., Di Santo, L., & Dubey, S. (2017). Multiple uprising invasions of Pelophylax water frogs, potentially inducing a new hybridogenetic complex. Scientific reports, 7(1), 6506.
Quilodrán, C. S., Montoya‐Burgos, J. I., & Currat, M. (2015). Modelling interspecific hybridization with genome exclusion to identify conservation actions: the case of native and invasive Pelophylax waterfrogs. Evolutionary Applications, 8(2), 199-210.
Dubey, S., Leuenberger, J., & Perrin, N. (2014). Multiple origins of invasive and ‘native’water frogs (Pelophylax spp.) in Switzerland. Biological Journal of the Linnean Society, 112(3), 442-449.
Holsbeek, G., & Jooris, R. (2010). Potential impact of genome exclusion by alien species in the hybridogenetic water frogs (Pelophylax esculentus complex). Biological Invasions, 12, 1-13.
Holsbeek, G., Mergeay, J., Hotz, H., Plötner, J., Volckaert, F. A. M., & De Meester, L. (2008). A cryptic invasion within an invasion and widespread introgression in the European water frog complex: consequences of uncontrolled commercial trade and weak international legislation. Molecular Ecology, 17(23), 5023-5035.
Vorburger, C., & Reyer, H. U. (2003). A genetic mechanism of species replacement in European waterfrogs?. Conservation Genetics, 4, 141-155.
